# Supplementary material for: Analysis of Nipah Virus Replication and Host Proteome Response Patterns in Differentiated Porcine Airway Epithelial Cells Cultured at the Air-Liquid Interface
Source: Preprints.org preprint supplement (doi:10.20944/preprints202303.0241.v1), 2023-03-14
Supplement: Supplementary file 1 [file supplementary]

**Primer sequences for qPCR.** Primer sequences are based on previous described work (Elvert et al., 2020).

| Primer                       | Sequences                        |
|------------------------------|----------------------------------|
| NiV-N for                    | 5'- ATCAATCGTGGTTATCTTGA -3'     |
| NiV-N rev                    | 5'- CAGCCAGTTCTGCAACTTGATC -3'   |
| porcine tubulin A1b for      | 5'- CTGAACCGCCTTATTAGCCAAA -3'   |
| porcine tubulin A1b rev      | 5'- CGTTCAGGGCCCCATCA -3'        |
| porcine IFN- $\beta$ for     | 5'- GCTAACAAGTGCATCCTCCAAA -3'   |
| porcine IFN- $\beta$ rev     | 5'- AAGCACATCATAGCTCATGGAAAG -3' |
| porcine IFN- $\lambda$ 3 for | 5'- AAGAGGGCCAAGGATGCCTTTGAA -3' |
| porcine IFN- $\lambda$ 3 rev | 5'- AGGCGGAAGAGGTTGAACATGACA -3' |
| porcine OAS1 for             | 5'- GAGCTGCAGCGAGACTTCCT -3'     |
| porcine OAS1 rev             | 5'- TGCTTGACAAGGCGGATGA -3'      |
| porcine ISG56 for            | 5'- TCAGAGGTGAGAAGGCTGGT -3'     |
| porcine ISG56 rev            | 5'- GCTTCCTGCAAGTGTCCCTC -3'     |
| porcine IL-6 for             | 5'- TGTCGAGGCTGTGCAGATTAGT -3'   |
| porcine IL-6 rev             | 5'- GGTGGCTTTGTCTGGATTCTTT -3'   |
| porcine IL-8 for             | 5'- CCGTGTCAACATGACTTCCAA -3'    |
| porcine IL-8 rev             | 5'- GCCTCACAGAGAGCTGCAGAA -3'    |

Elvert, M., L. Sauerhering, and A. Maisner. 2020. Cytokine Induction in Nipah Virus-Infected Primary Human and Porcine Bronchial Epithelial Cells. *J Infect Dis.* 221:S395-S400.

#### Primary antibodies

| Target                      | Host species | Clonality            | Source        | RRID       | Dilution |
|-----------------------------|--------------|----------------------|---------------|------------|----------|
| $\alpha$ - $\beta$ -tubulin | Mouse        | Monoclonal (TUB 2.1) | Sigma-Aldrich | AB_477577  | 1:100    |
| $\alpha$ -Mucin-5AC         | Mouse        | Monoclonal (SPM297)  | Origene       | N/A        | 1:100    |
| $\alpha$ -ZO-1              | Rabbit       | Polyclonal           | Thermo Fisher | AB_2533938 | 1:200    |
| $\alpha$ - $\beta$ -catenin | Rabbit       | Polyclonal           | Thermo Fisher | AB_2533938 | 1:100    |
| $\alpha$ -Cytokeratin 5     | Rabbit       | Polyclonal           | Thermo Fisher | AB_869889  | 1:1000   |
| $\alpha$ -HeV-N             |              |                      |               |            |          |
| (detects NiV-N)             | Rabbit       | Polyclonal           | FLI           | N/A        | 1:1000   |
| $\alpha$ -NiV-P             | Rabbit       | Polyclonal           | FLI           | N/A        | 1:1000   |

#### Fluorophore conjugated secondary antibodies

| Target               | Host species | Conjugate        | Source     | RRID       | Dilution |
|----------------------|--------------|------------------|------------|------------|----------|
| $\alpha$ -rabbit IgG | Donkey       | Alexa Fluor® 488 | Invitrogen | AB_2535792 | 1:1000   |
| $\alpha$ -mouse IgG  | Donkey       | Alexa Fluor® 488 | Invitrogen | AB_141607  | 1:1000   |
| $\alpha$ -rabbit IgG | Donkey       | Alexa Fluor® 568 | Invitrogen | AB_2534017 | 1:1000   |
| $\alpha$ -mouse IgG  | Donkey       | Alexa Fluor® 568 | Invitrogen | AB_2534013 | 1:1000   |
